# Supplementary material
Source: PubMed Central journal article supplement (PMC7196128)
Supplement: 41422_2020_288_MOESM6_ESM.pdf [file 41422_2020_288_MOESM6_ESM.pdf]

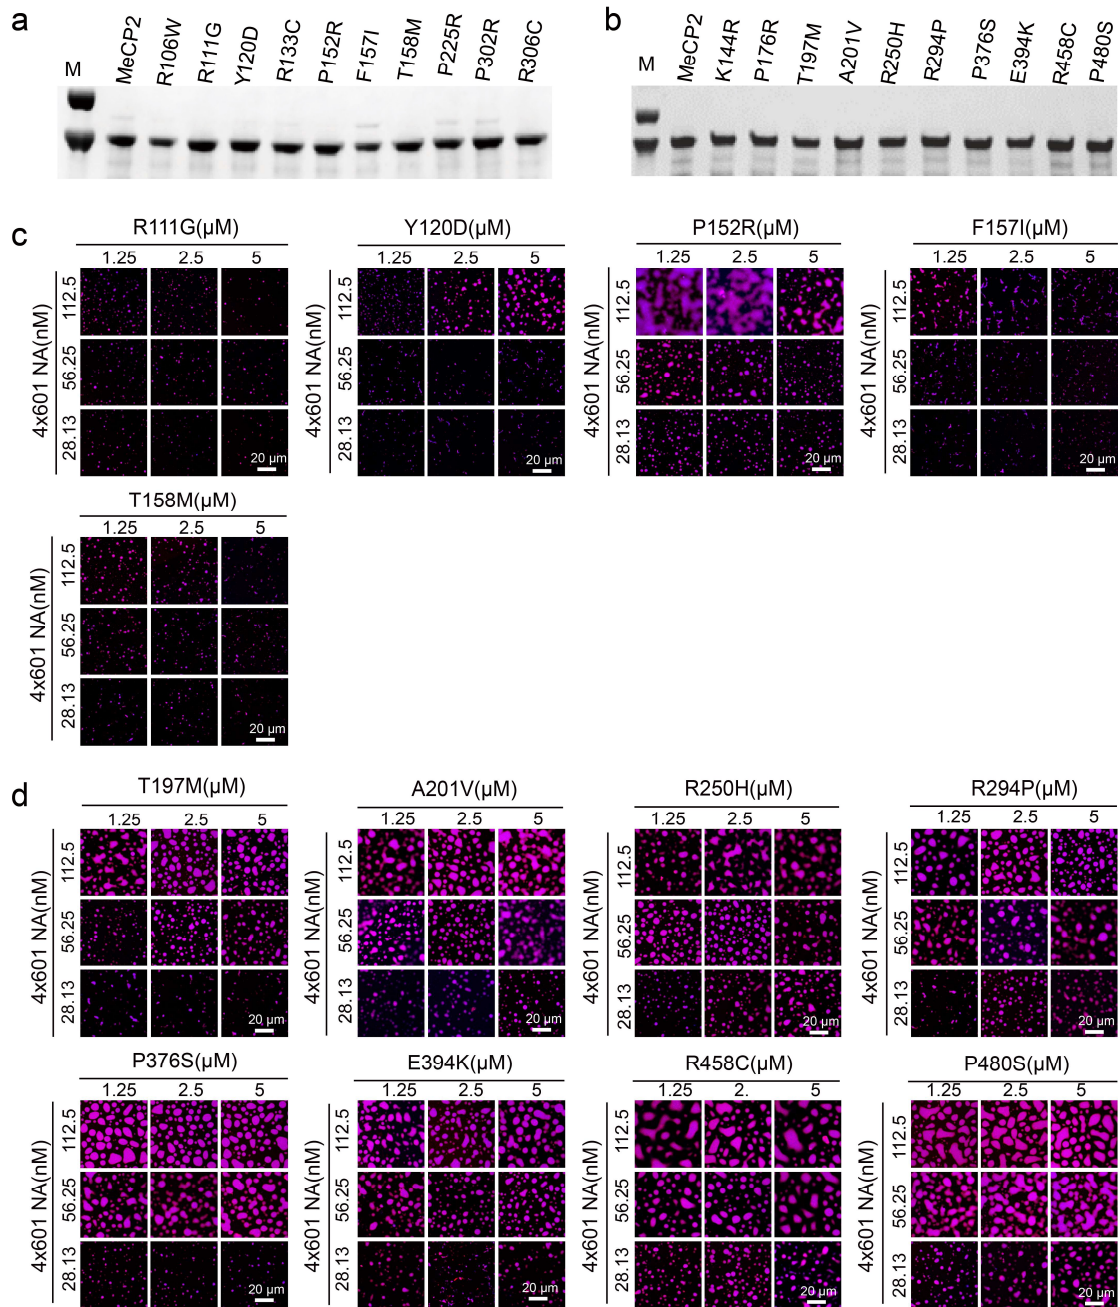

**Supplementary information, Fig. S6. Phase diagrams of Rett syndrome-related MBD missense mutations or benign polymorphic variants with 4x601 NA.**

**a** SDS-PAGE analysis of purified WT MeCP2 and the Rett syndrome-related missense mutants. **b** SDS-PAGE analysis of purified WT MeCP2 and the benign polymorphic variants. **c** Phase diagrams of WT MeCP2 and the Rett syndrome-related MBD missense mutants in Fig. 4a and Supplementary information, Fig. S6a. Scale bars, 20

$\mu\text{m}$ . **d** Phase diagrams of WT MeCP2 and the benign polymorphic variants in Fig. 4b and Supplementary information, Fig. S6b. Scale bars, 20  $\mu\text{m}$ .
