# Supplementary material
Source: PubMed Central journal article supplement (PMC7196128)
Supplement: 41422_2020_288_MOESM9_ESM.pdf [file 41422_2020_288_MOESM9_ESM.pdf]

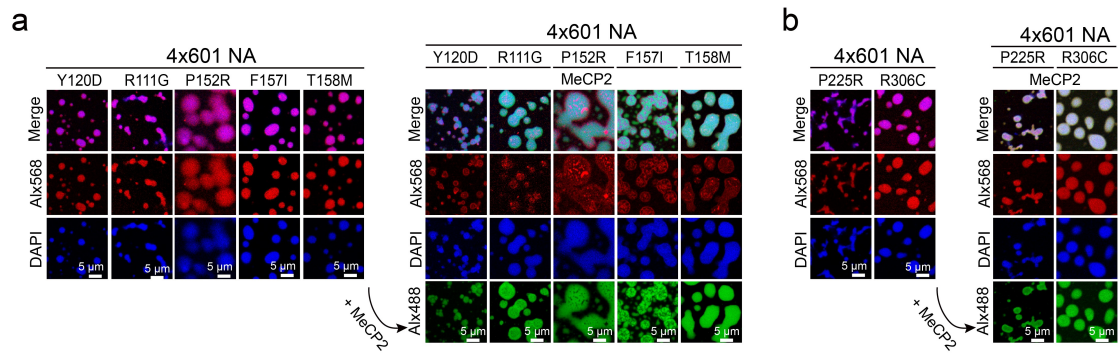

**Supplementary information, Fig. S9. Rescue of wild type MeCP2 to Rett-related MeCP2 missense mutations in phase diagrams with 4xNA.**

**a** Left panels, phase separation droplets formed by the Rett-MBD missense mutations with 4xNA. Right panels, the Rett-MBD missense mutations proteins in droplets of left panels were exchanged and replaced by extra-added wild-type MeCP2 protein. Scale bars, 5 μm. **b** Left panels, phase separation droplets formed by the Rett-TRD missense mutations with 4xNA. Right panels, extra-added wild-type MeCP2 protein on the left panels. Scale bars, 5 μm.
